# Supplementary material for: Sequence and Expression of Complement Factor H Gene Cluster Variants and Their Roles in Age-Related Macular Degeneration Risk
Source: PubMed Central journal article supplement — Invest Ophthalmol Vis Sci. 2016 May 19;57(6):2763–9. doi: 10.1167/iovs.15-18744 (PMC4884056; doi:10.1167/iovs.15-18744), 2016-05-19
Supplement: i1552-5783-57-6-2763-s2.pdf [file i1552-5783-57-6-2763-s2.pdf]

## Legends to Supplementary Figures and Tables

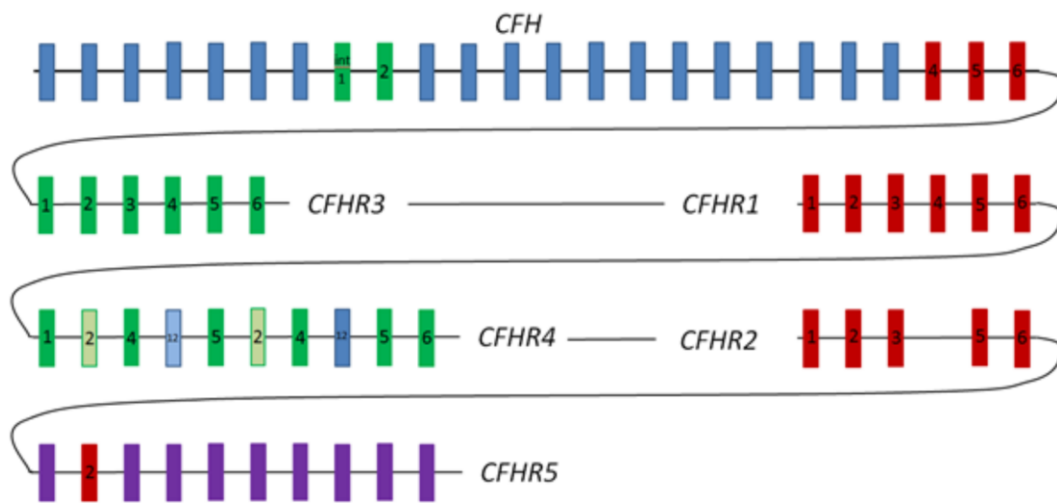

Figure S1. Schematic representation of the *CFH* region exons. These genes are located in tandem on chromosome 1. Several exons of *CFHR3* (in green), *CFHR1* (in red) and *CFH* (in blue) are duplicated in *CFH*, *CFHR4*, *CFHR2* and *CFHR5*. *CFH* exon 8 is a duplicate of *CFHR3* intron 1 and *CFH* exon 9 is a duplicate of *CFHR3* exon 2. *CFHR1* exons 4, 5 and 6 are duplicated as the ultimate 3 exons of *CFH*. *CFHR4* is closely related to *CFHR3* and *CFHR2* is closely related to *CFHR1*.

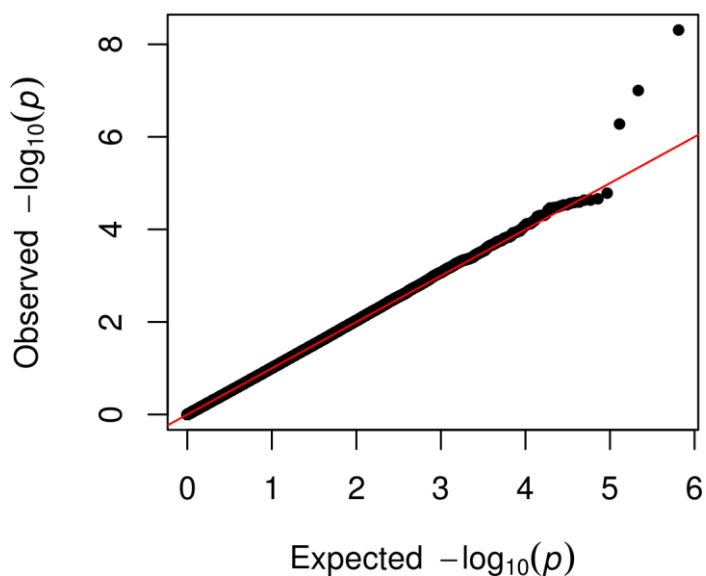

Figure S2. Q-Q plot of genome-wide case-case study of neovascular AMD compared to drusen.

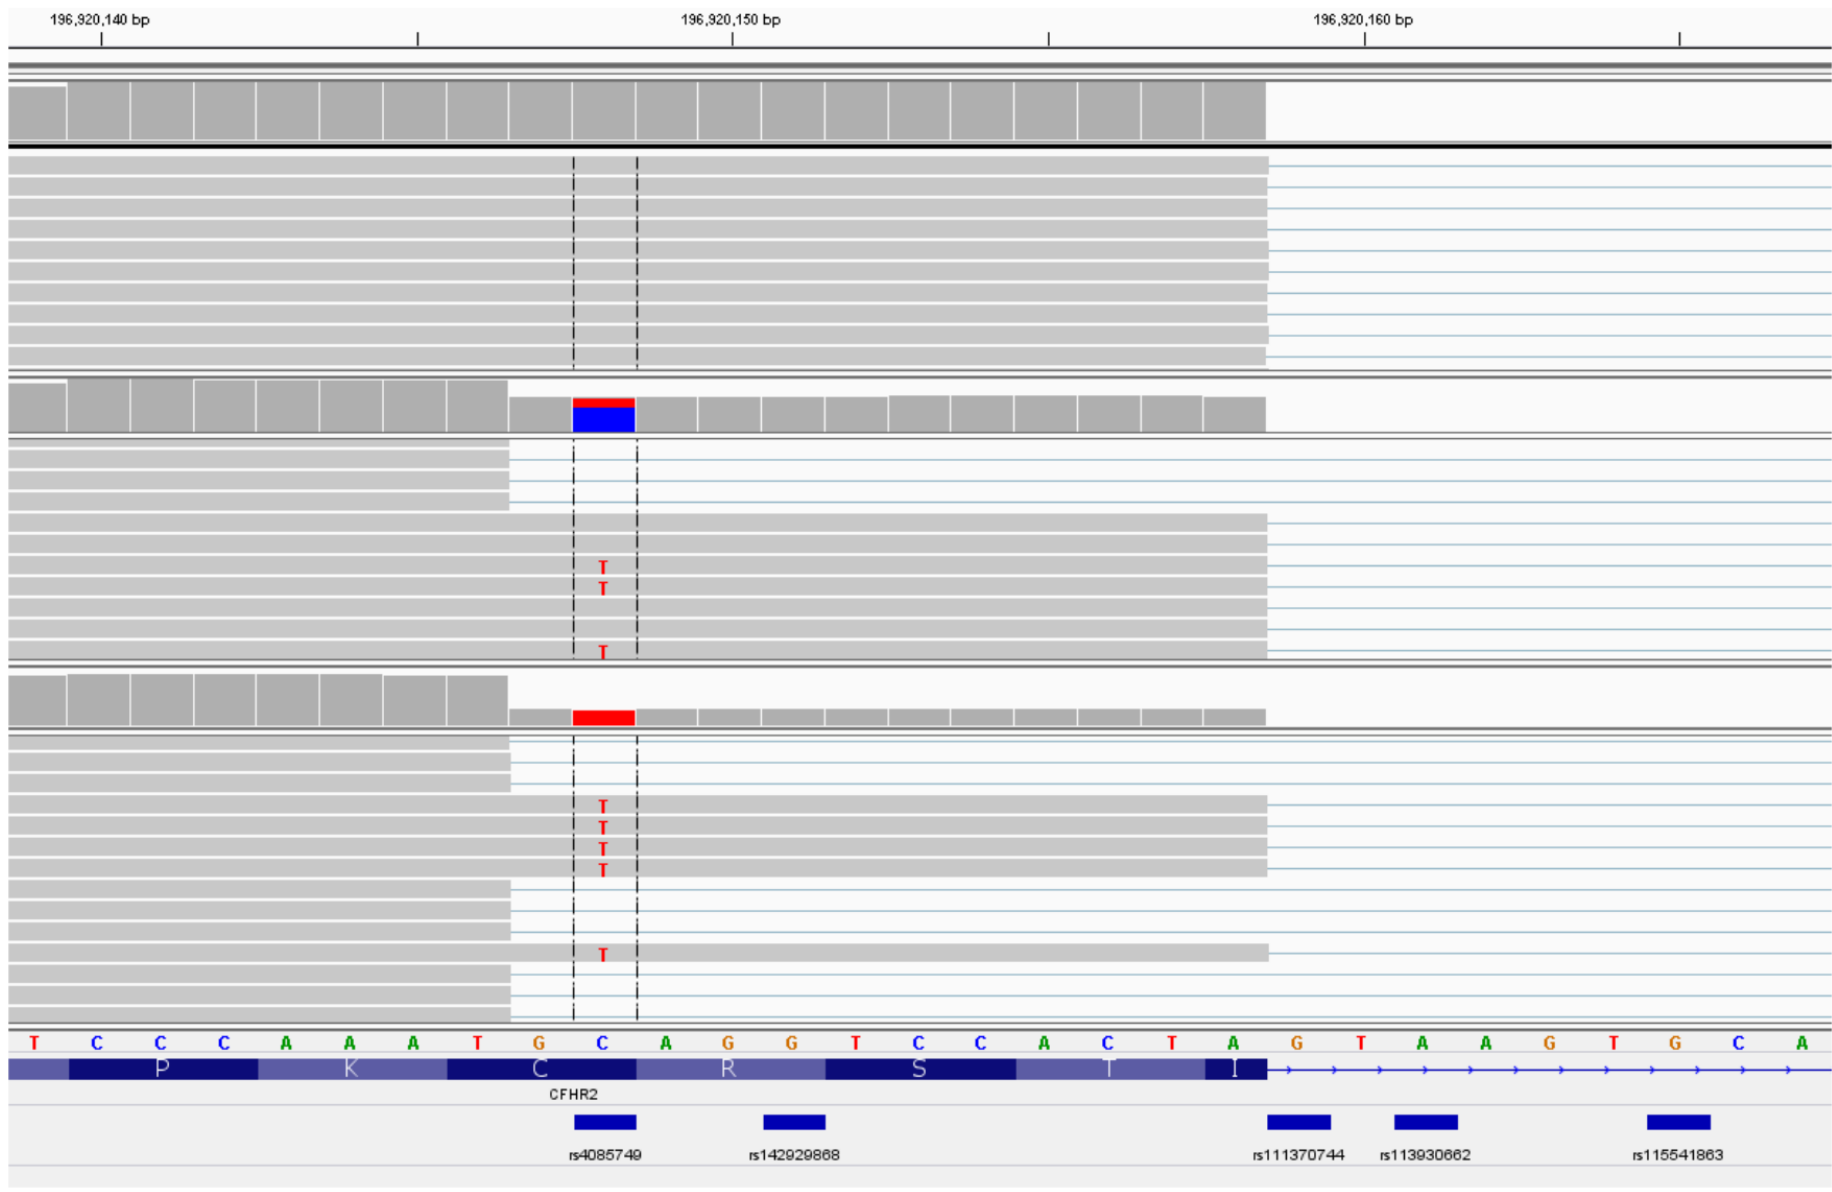

Figure S3. *CFHR2* rs4085749 (C140C) in liver RNA-seq reads from carriers of haplotypes BD (top panel), AC (middle panel) and CC (bottom panel), carrying 0, 1 and 2 copies of the T allele, respectively. Note the reduction in read depth and early splicing associated with the majority of T allele reads (figure produced in Integrative Genomics Viewer).

Table S1. Study Population.

| Experiment                                         | Participants (n)            | % Male     | Average Age (years) | Origin                |
|----------------------------------------------------|-----------------------------|------------|---------------------|-----------------------|
| Massively parallel sequencing of <i>CFH</i> region | 4                           | 100        | 76                  | Northern Ireland, UK. |
| RNA-seq of eye tissues                             | 8                           | 63%        | 73.9                | USA                   |
| RNA-seq of liver                                   | 3                           | NA         | NA                  | NA                    |
| Secondary analyses of AMD GWAS                     | 2157 cases<br>1150 controls | 38%<br>44% | 78.6<br>74.1        | USA                   |

Table S2. Synonymous SNPs in *CFH* and *CFH*-related genes identified from massively-parallel sequencing of genomic DNA of four homozygous individuals.

| Gene        | <i>CFH</i> | <i>CFH</i> | <i>CFH</i> | <i>CFH</i> | <i>CFHR3</i> | <i>CFHR3</i> | <i>CFHR3</i>             | <i>CFHR3</i> | <i>CFHR3</i> | <i>CFHR1</i> | <i>CFHR1</i> | <i>CFHR1</i> | <i>CFHR1</i> | <i>CFHR4</i>             | <i>CFHR5</i> | <i>CFHR5</i> |
|-------------|------------|------------|------------|------------|--------------|--------------|--------------------------|--------------|--------------|--------------|--------------|--------------|--------------|--------------------------|--------------|--------------|
| SNP         | rs1061147  | rs2274700  | rs3753396  |            | rs446868     | rs400344     | rs149352569/<br>rs379049 | rs402372     | rs390837     | rs3201739    | rs4230       | rs414628     | rs390679     | rs150845796/<br>rs379049 | rs9427662    | rs10922153   |
| Codon       | A307A      | A473A      | Q672Q      | T1046T     | 5'UTR        | S159S        | P262P*                   | 3' UTR       | 3' UTR       | T196T        | R302R        | R314R        | 3' UTR       | P509P*                   | 5' UTR       | 3' UTR       |
| Haplotype A | A          | G          | A          | C          | C            | C            | A                        | C            | G            | A            | G            | A            | C            | A                        | T            | G            |
| Haplotype B | C          | G          | G          | C          | A            | T            | T>A                      | T            | C            | A            | G            | A            | C            | A>T                      | T            | G            |
| Haplotype C | C          | A          | A          | C>T        | C            | T            | A                        | C            | G            | G            | T            | T            | A            | A                        | T            | T            |
| Haplotype D | C          | A          | A          | C          | null         | null         | null                     | null         | null         | null         | null         | null         | null         | A                        | T/C          | T            |

\**CFHR3* P262P and *CFHR4* P509P represent the same SNP. *CFHR4* P509P is a mapping artefact.

Table S3. SNPs with association  $p < 5 \times 10^{-5}$  in additive model logistic regression of 867 cases of neovascular AMD compared to 519 with drusen in a genome-wide case-case study.

| SNP       | Gene         | Allele | Odds Ratio | P                     |
|-----------|--------------|--------|------------|-----------------------|
| rs932275  | <i>HTRA1</i> | A      | 1.60       | $4.91 \times 10^{-9}$ |
| rs2248799 | <i>HTRA1</i> | C      | 0.66       | $9.95 \times 10^{-8}$ |
| rs4075920 | <i>ALK</i>   | T      | 0.65       | $5.28 \times 10^{-7}$ |
| rs931257  | -            | C      | 0.68       | $1.65 \times 10^{-5}$ |
| rs6991827 | -            | A      | 0.67       | $2.18 \times 10^{-5}$ |
| rs6467778 | -            | A      | 0.65       | $2.32 \times 10^{-5}$ |
| rs6560293 | <i>TMC1</i>  | A      | 0.71       | $2.33 \times 10^{-5}$ |
| rs4688950 | -            | C      | 0.68       | $2.57 \times 10^{-5}$ |

|            |                |   |      |                       |
|------------|----------------|---|------|-----------------------|
| rs12076580 | -              | A | 0.70 | 2.62x10 <sup>-5</sup> |
| rs12052880 | <i>LRP1B</i>   | A | 0.70 | 2.74x10 <sup>-5</sup> |
| rs1544733  | <i>TRIM24</i>  | C | 0.66 | 2.95x10 <sup>-5</sup> |
| rs9938986  | -              | C | 0.68 | 2.96x10 <sup>-5</sup> |
| rs2280141  | <i>PLEKHA1</i> | A | 0.72 | 3.13x10 <sup>-5</sup> |
| rs785512   | <i>PIK3R3</i>  | A | 0.70 | 3.31x10 <sup>-5</sup> |
| rs1709835  | <i>KCNJ6</i>   | T | 0.73 | 3.35x10 <sup>-5</sup> |
| rs4833961  | -              | A | 0.71 | 3.43x10 <sup>-5</sup> |
| rs4660883  | <i>TRIM24</i>  | A | 0.70 | 3.44x10 <sup>-5</sup> |
| rs785484   | <i>PIK3R3</i>  | T | 0.70 | 3.79x10 <sup>-5</sup> |
| rs1052748  | <i>PLD2</i>    | T | 1.38 | 4.66x10 <sup>-5</sup> |
| rs1622208  | <i>MAST2</i>   | T | 0.71 | 4.99x10 <sup>-5</sup> |
| rs6585827  | <i>PLEKHA1</i> | G | 0.72 | 4.99x10 <sup>-5</sup> |

Table S4. Minor allele frequencies and results of additive model analyses in candidate gene study of cases with neovascular AMD, drusen and unaffected controls from the MMAP study.

| Gene       | Variant     | Allele | Frequency |      |          | Drusen: Unaffected |                        | NV AMD: Unaffected |                        | NV AMD:Drusen |      |
|------------|-------------|--------|-----------|------|----------|--------------------|------------------------|--------------------|------------------------|---------------|------|
|            |             |        | Drusen    | AMD  | Controls | OR                 | P                      | OR                 | P                      | OR            | P    |
| <i>CFH</i> | Haplotype A | CACG   | 0.59      | 0.60 | 0.36     | 2.59               | 9.06x10 <sup>-32</sup> | 2.75               | 4.12x10 <sup>-46</sup> | 1.05          | 0.57 |
| <i>CFH</i> | Haplotype B | CGTG   | 0.15      | 0.15 | 0.17     | 0.89               | 0.24                   | 0.90               | 0.24                   | 1.02          | 0.86 |
| <i>CFH</i> | Haplotype C | TGCG   | 0.11      | 0.11 | 0.23     | 0.44               | 2.23x10 <sup>-13</sup> | 0.41               | 1.68x10 <sup>-20</sup> | 0.95          | 0.68 |

|              |             |      |      |      |      |      |                        |      |                        |      |                       |
|--------------|-------------|------|------|------|------|------|------------------------|------|------------------------|------|-----------------------|
| <i>CFH</i>   | Haplotype D | CGCA | 0.10 | 0.09 | 0.20 | 0.47 | $1.75 \times 10^{-10}$ | 0.41 | $1.33 \times 10^{-18}$ | 0.88 | 0.33                  |
| <i>CFB</i>   | rs429608    | A    | 0.08 | 0.08 | 0.16 | 0.48 | $8.11 \times 10^{-9}$  | 0.48 | $4.60 \times 10^{-12}$ | 1.00 | 0.98                  |
| <i>HTRA1</i> | rs932275    | A    | 0.33 | 0.44 | 0.18 | 2.13 | $6.94 \times 10^{-18}$ | 3.36 | $1.41 \times 10^{-56}$ | 1.60 | $4.01 \times 10^{-9}$ |
| <i>C3</i>    | rs2250656   | G    | 0.27 | 0.25 | 0.31 | 0.82 | 0.02                   | 0.75 | $5.65 \times 10^{-5}$  | 0.92 | 0.32                  |

NV, neovascular; AMD, age-related macular degeneration; OR, odds ratio; P, *P* value. *CFH* haplotype SNPs: rs800292, rs10801555, rs11582939, rs6677604

Table S5. RNA-Seq read depth at final base of *CFH* exon 9 or first base of exon 10a (FHL-1 expression) or 10 (FH expression), with % of FH transcription.

| Donor | Peripheral Retina |          |         |      | Macular Retina |          |         |       | Peripheral RPE/Choroid/Sclera |          |         |      | Macular RPE/Choroid/Sclera |          |         |      |
|-------|-------------------|----------|---------|------|----------------|----------|---------|-------|-------------------------------|----------|---------|------|----------------------------|----------|---------|------|
|       | exon 9            | exon 10a | exon 10 | % FH | exon 9         | exon 10a | exon 10 | % FH  | exon 9                        | exon 10a | exon 10 | % FH | exon 9                     | exon 10a | exon 10 | % FH |
| 1     | 14                | 10       | 3       | 23.1 | 12             | 3        | 8       | 72.7  | 437                           | 274      | 114     | 29.4 | 395                        | 341      | 54      | 13.7 |
| 2     | 15                | 7        | 5       | 41.7 | 12             | 0        | 9       | 100.0 | 541                           | 245      | 272     | 52.6 | 616                        | 385      | 221     | 36.5 |
| 3     | 22                | 13       | 13      | 50.0 | 16             | 1        | 12      | 92.3  | 731                           | 313      | 358     | 53.4 | 257                        | 169      | 96      | 36.2 |
| 4     | 9                 | 3        | 8       | 72.7 | 16             | 2        | 12      | 85.7  | 384                           | 160      | 189     | 54.2 | 416                        | 248      | 153     | 38.2 |
| 5     | 10                | 4        | 5       | 55.6 | 17             | 2        | 12      | 85.7  | 317                           | 141      | 146     | 50.9 | 247                        | 106      | 147     | 58.1 |
| 6     | 20                | 11       | 7       | 38.9 | 17             | 6        | 10      | 62.5  | 368                           | 184      | 180     | 49.5 | 266                        | 206      | 55      | 21.1 |
| 7     | 6                 | 4        | 2       | 33.3 | 37             | 17       | 18      | 51.4  | 726                           | 364      | 306     | 45.7 | 114                        | 61       | 41      | 40.2 |
| 8     | 0                 | 0        | 0       | N/A  | 0              | 0        | 0       | N/A   | 57                            | 24       | 31      | 56.4 | 6                          | 14       | 0       | 0.0  |

Table S6. Median of mean exonic read depths for each gene in liver RNA-seq samples from three individuals, adjusted for sequencing bias and normalised to FH<sup>†</sup>.

|                         | Haplotype |        |      |
|-------------------------|-----------|--------|------|
|                         | AC        | BD>AD* | CC   |
| <i>CFHR1</i>            | 2.50      | 1.31   | 1.96 |
| <i>CFHR2</i>            | 1.48      | 0.93   | 0.98 |
| <i>CFH</i> <sup>†</sup> | 1.00      | 1.00   | 1.00 |
| <i>CFHR3</i>            | 0.48      | 0.20   | 0.25 |
| <i>CFHR4</i>            | 0.10      | 0.17   | 0.10 |
| <i>CFHR5</i>            | 0.09      | 0.16   | 0.05 |

\*Haplotype D carries a deletion of *CFHR3* and *CFHR1*

<sup>†</sup>Restricted to exons 1-9, which are common to FH and FHL-1

Table S7. Numbers of exon-spanning RNA-seq reads of liver samples from three individuals and % of full-length *CFH* transcripts, according to haplotype.

| Haplotype                                     | BD>AD | AC  | CC   |
|-----------------------------------------------|-------|-----|------|
| FHL-1 transcripts of <i>CFH</i> (exons 9-10a) | 206   | 523 | 1080 |
| FH transcripts of <i>CFH</i> (exons 9-10)     | 306   | 432 | 434  |
| % FH                                          | 60    | 45  | 29   |
